# Supplementary material
Source: Springer Nature journal article supplement (https://www.springerprofessional.de/resource/supplementary/13673_2012_31_MOESM3_ESM.pdf/11899394)
Supplement: MOESM3 [file 11899394]

For each object resource  $R$  begin

For each extracted term  $T$  from  $R$  begin

If the term is the representative of an object resource  $R'$  OR a content resource  $R'$  then begin

Add relationship from  $R$  to  $R'$  such that  $R'$  is a property of  $R$ ;

else begin

Recognize that  $T$  is a newly-added object resource  $R'$ ;

Set that  $T$  is representative of  $R'$ ;

Add relationship from  $R$  to  $R'$  such that  $R'$  is a property of  $R$ ;

end;

end;

end.
